# Supplementary material for: Molecular characterization of the genome-wide BOR transporter family and their responses to boron conditions in common wheat (Triticum aestivum L.)
Source: Front Plant Sci. 2022 Oct 6;13:997915. doi: 10.3389/fpls.2022.997915 (PMC9583536; doi:10.3389/fpls.2022.997915)
Supplement: Supplementary file 1 [file Table_1.XLSX]

## Sheet: Supplement table 1
species	gene	ID	sequence
Triticum aestivum	TaBOR4-1A	TraesCS1A02G117500	MKKTKGVDRGRASCYKDWHNGSSGRATYASAVAGSKDTDGTTTVTASTACGHSVGGVGVATMYTYYSAKNNGRAWAGWVC
			WTAVMMAMNAAAANRTRAGGMTMAKGMSSVGKDSYWVYNGGVSMGYTAKSRSARSSYGAGWRNVADYGVMVWTASYSTKS
			GVRRTWKSHWTVAKSVAYAVAVMVAGYDHSVASMAKNKNSAYHYDVSSVCGGSNGVAMHTRSAVRRARKMVRTAKGMMNN
			ASSSVYGKMVKMDDKGNDSAHKKKDAVTGKTGNGAVTAVDKHAYVRVNRVSNSVAGCGVVVKTSVWGYGYMSDSGNGRTR
			RRYKKTGSWGYSSVDRVGAHASSVNATVYVWGMTWVAGVRHKDTRHWDASYCGVHRDSGDGSTRGDSYTAVMTTHRGKHR
			ASRDRRNSVMTRSRSSATR
Triticum aestivum	TaBOR4-1B	TraesCS1B02G137300	MGGKRRRAAARRTGACVAGGGGAVARRSGATRASTRGTAMKKTKGVDRGRASCYKDWHNGSSGRATYASAVAGSKDTDGT
			TTVTASTACGHSVGGVGVATMYTYYSAKNNGRAWAGWVCWTAVMMAMNAAAANRTRAGGMTMAKGMSSVGKDSYWVYNGG
			SMGYTAKSRSARSSYGAGWRNVADYGVMVWTTSYSTKSGVRRTWKSHWTVAKSVAYAVAVMVAGYDHSVASMAKNKNSAY
			HYDVSSVCGGSNGVAMHTRSAVRRARKMVRTAKGMMNNASSSVYGKMHVKMDDKGNDSAHKKKDATGKKTGNGAVTAVDK
			HAYVRVNRVSNSVAGCGVVVKTSVWGYGYMSDSGNWRSRRRYKVGAHASSVNATVYMVWGMTWVAGRHKDTRHWDASYCG
			VHRDSGDGSTRGDSYTAVMTTHRGKHRASRDRRNSVMTRSRSSATR
Triticum aestivum	TaBOR4-1D	TraesCS1D02G118600	MGGKERRLQPRPAPARLLLLPMPGFAPCVAGGGGIAVALRRISCATLRLASPTPPRPGTPLLAMEPKKTLFKGVIEDFRG
			RASCYKQDWHNGFSSGFRILAPTLYIFFASALPVIAFGEQLSKDTDGTLTTVETLASTAICGIIHSVLGGQPLLIVGVAE
			PTIIMYTYLYNFAKNQPNLGERLFLAWAGWVCIWTAVMLFLMAMFNAAAALNRFTRFAGELFGMLITILFMQEAIKGMLS
			EFSVPEGKDQSLPIYQFQWVYINGLLGIIFSMGLLYTALKSRSARSSLYGAGWLRNVIADYGVPLMVILWTALSYSLPTK
			IPSGVPRRLFTPLPWEPKSLQHWTVAKELFSVPLAYILLAIVPAMMVAGLYFFDHSVASQMAQQKEFNLKNPSAYHYDIL
			VLSFSVLICGLLGIPPSNGVLPQAPMHTRSLAVLRRQALRKQMVRTAKEGMMNNASSSEVYGKMQEVFIKMDDKGNEDSA
			HKELKELKDAVITEGEKITEGNGAVTAPEVFDPEKHLEAYLPVRVNEQRVSNLLQSLLVAGCIGVVPVIQKIPTSVLWGY
			FGYMSIDSLPGNQFGERLQLLFIAPRRRYKVLEGAHASFLESVPFNQILAFTLFQLIYLLIVWGMTWIPVAGILFPLLFF
			FLVIIREHLLPKFFDTRHLWELDASEYEECEGVHRDPSIPEGDGESITRGIEDPSEYTAEVMEEFTTHRGELKHRAPSFR
			DERLIRLNSVQMTRQFSRISSFAPTRP
Triticum aestivum	TaBOR3-3A	TraesCS3A02G126300	MDLLGNPFKGVVADVKGRASWYRDDWVAGLRTGFRILAPTMYIFFASALPVISFGEQLSNETDGILSTVETLASTAICGI
			IHSILGGQPLLIVGVAEPTIIMYTYLYKFAKKQPDLGEQLYLAWAGWVCIWTAIMLFLLAMFNASNIISRFTRVAGELFG
			MLITVLFLQQAIKGIVSEFSMPKDDEISDPSSPIYQFQWIYVNGLLGVIFSIGLLYTALKTRRARSWLFGIGWLRSFIAD
			YGVPLMVIVWTAFSFALPSKVPSGVPRRLFSPLPWESISLRHWTVAKDLFSVPPTYIFAAIVPALMVAGLYFFDHSVASQ
			LAQQKEFNLKKPSAYHYDILVLXXXVLLCGLLGIPPSNGVLPQSPMHTRSLAVLKGQLLRKKMLQTAKEGMSNRASSLEI
			YGKMQEVFIQMDSNMNANSVDKDLKSLKDAVLREGDEEGKLAGEFDPSKHIEAHLPVRVNEQRLSNLLQSLLVGGCVGAM
			PVIKMIPTSVLWGYFAYMAIDSLPGNQFWERLQLLCIGASRRYKVLEGPHASFVESVPSRTISAFTVFQFVYLLICFGIT
			WIPVAGILFPLPFFIMILIRQHLLPKFFEPNDLRELDAAEYEELEGVPHEQTPEEDGSNSGSCDSRDDSEILDELTTNRG
			ELKHRSVSHPEERHLQIHSNAVQPSV
Triticum aestivum	TaBOR3-3B	TraesCS3B02G145500	MDLLGNPFKGVVADVQGRASWYKDDWVAGLRTGFRILAPTMYIFFASALPVISFGEQLSNETDGILSTVETLASTAICGI
			IHSILGGQPLLIVGVAEPTIIMYTYLYKFARKQPDLGEQLYLAWAGWVCIWTSIMLFLLAMFNASNVISRFTRVAGELFG
			MLITVLFLQQAIKGIVSEFSMPKDDEISDPSSPIYQFQWIYVNGLLGVIFSIGLLYTALKTRRARSWLYGIGWLRSFIAD
			YGVPLMVIVWTAFSFALPSKVPSGVPRRLFSPLPWESISLRHWTVAKDLFSVPPTYIFAAIVPALMVAGLYFFDHSVASQ
			LAQQKEFNLKKPSAYHYDILVLGFMVLLCGLLGIPPSNGVLPQSPMHTRSLAVLKGQLLRKKMLQTAKEGMSNRASSLEI
			YGKMQEVFIQMDSNMNANSVDKDLKSLKDAVLREGDEEGKLAGEFDPSKYIEAHLPVRVNEQRLSNLLQSLLVGGCVGAM
			PVLKMIPTSVLWGYFAYMAIDSLPGNQFWERLQLLCIGASRRYKVLEGPHASFVESVPSRTISAFTVFQFVYLLICFGIT
			WIPVAGILFPLPFFIMILIRQHLLPKFFEPNDLRELDAAEYEELEGVPHEQILEEDGSDSGSCDSRDDSEILDELTTNRG
			ELKHRTVNHPEERHLQVHSNAVQPSV
Triticum aestivum	TaBOR3-3D	TraesCS3D02G127300	MDLLGNPFKGVVGDVKGRASWYKDDWVAGLRTGFRILAPTMYIFFASALPVISFGEQLSNETDGILSTVETLASTAICGI
			IHAILGGQPLLIVGVAEPTIIMYTYLYKFAKKQPDLGEQLYLAWAGWVCIWTAIMLFLLAMFNASNVISRFTRVAGELFG
			MLITVLFLQQAIKGIVSEFSMPKDDEISDPSSPIYQFQWIYVNGLLGVIFSIGLLYTALKTRRARSWLYGIGWLRSFIAD
			YGVPLMVIVWTAFSFTLPSKVPSGVPRRLFSPLPWESISLRHWTVAKDLFSVPPTYIFAAIVPALMVAGLYFFDHSVASQ
			LAQQKEFNLKKPSAYHYDILVLGFMVLLCGLLGIPPSNGVLPQSPMHTRSLAVLKGQLLRKKMLQTAKEGMSNRASSLEI
			YGKMQEVFIQMDSNQNANSVDKDLKSLKDAVLWEGDEEGKLAGEFDPSKYIEAHLPVRVNEQRLSNLLQSLLVGGCVGAM
			PVIKMIPTSVLWGYFAYMAIDSLPGNQFWERLQLLCIGASRRYKVLEGPHASFVESVPSRTISAFTVFQFVYLLICFGIT
			WIPVAGILFPLPFFIMILIRQHLLPKFFEPNDLRELDAAEYEELEGVPHEQTLEEDGSNSGSCDSRDDSEILDELTTNRG
			ELKHRSVSHPEERHFQVHSNAVQPSV
Triticum aestivum	TaBOR3-4B	TraesCS4B02G330000	MDLLRSPFKGVVADVQGRAPWYKDDWLAGLRAGFGILAPTMYIFFASALPVIAFGEQLSNETNGILSTVETLASTAICGI
			IHAILGGKPMMIVGVAEPTIIMYTYLYNFAKKQPGLGERLYLAWAGWVCIWTAIMLFLLAMFNASNVISRFTRVAGELFG
			MLITVLFLQEAIKGIVSEFSMPKDAKISDRSSPIYQFQWIYVNGLLGVIFSIGLLYSALKTRRARSWLYGIGWIRSFIAD
			YGVPLMVIAWTAFSYALPSGVPSGVPRRLFSPLPWESSSLGHWTVAKDLLSVPPVYIFAAIVPALMVAGLYFFDHSVASQ
			LAQQQEFNLKKPSAYHYDILVLGFMVLICGLIGIPPANGVLPQSPMHTRSLAVLKGQLMRKKMLRTAKEGMSNRASSLEI
			YGKMHEVFIEMDNKQDADSVDKDLKSLKDAVLREGDEDGKLAGEFDPRKHIEAHLPVRVNEQRLSNLLQSLLVGGCVGAM
			PVIKMIPTSVLWGYFAYMAIDSLPGNQFWERIQFLCIGASRRYKVLEGPHASFVESVSPRTIYVFTIFQIVYFLICFGTT
			WIPIAGILFPLPFFLMILIRQYLLPKFFEPNDLRELDAAEYEELEGVQHEHTLLEEDGSISGSCDGRIGAEILDELTTHR
			GELKHRIVSHREERHLQVHSNAVQPSV
Triticum aestivum	TaBOR3-4D	TraesCS4D02G326900	MDLLRSPFKGVVADVKGRAPWYKDDWLAGLRAGFGILAPTMYIFFASALPVIAFGEQLSNETNGILSTVETLASTAICGI
			IHAILGGQPMMIVGVAEPTIIMYTYLYNFAKKQPGLGERLYLAWAGWVCIWTAIMLFLLAMFNASNVISRFTRVAGELFG
			MLITVLFLQEAIKGIVSEFSMPKDAEISDRGSPIYQFQWIYVNGLLGVIFSIGLLYSALKTRRARSWLYGIGCVRSFIAD
			YGVPLMVIVWTAFSYTLPGGVPSGVPRRLFSPLPWESSSLGHWTVAKDLFSVPPAYIFAAIVPALMVAGLYFFDHSVASQ
			LAQQQEFNLKKPSAYHYDILLLGFMVLLCGLIGIPPANGVLPQSPMHTRSLAVLKGQLMRKRMLRTAKEGMSNRASSLEI
			YGKMHEVFIEMDNKQDADSVDKDLKSLKDAVLREGDEDGKLAGEFDPRKHIEAHLPVRVNEQRLSNLLQSLLVGGSVGAM
			PVIKMIPTSVLWGYFAYMAIDSLPGNQFWERIQFLCIGASRRYKVLVGPHASFVELVSPRTIYVFTIFQIVYFLICFGTT
			WIPIAGILFPLPFFLMILIRQYLLPKFFEPNDLRELDAAEYEELEGVQHEHTLEEDGSISGSCDSRIDAEILDELTTHRG
			ELKHRVVSHREERHLQVHSNAIQPSV
Triticum aestivum	TaBOR1-5A	TraesCS5A02G085200	MEESFVPLRGIKNDVRGRLTCYKQDWTGGFSAGIRILAPTTYIFFASAIPVISFGEQLERSTDGVLTAVQTLASTALCGI
			IHSIVGGQPLLILGVAEPTVIMYTFMFSFAKDRADLGPNLFLAWAGWVCVWTALLLFLLAVLGACSIINRFTRIAGELFG
			LLIAMLFMQQAIKGLVDEFRIPERENIKALQFVPSWRFANGMFAIVLSFGLLLTALRSRKARSWRYGAGWLRGFIADYGV
			PLMVLVWTGVSYIPHDSVPKGIPRRLFSPNPWSPGAYDNWTVIKDMLQVPVMYIIGAFMPATMIAVLYYFDHSVASQLAQ
			QAEFNLRKPPSFHYDLLLLGFLTLMCGLIGIPPSNGVIPQSPMHTKSLATLKHQILRNRLVATARQSMRQNASLSQLYNN
			MQDAYHQIQTPLIHQQQTVKGLNELKDSTVQLASSMGNFDAPVDETIFDIEKEIDDLLPMEVKEQRLSNFLQAVMVGGCV
			AAMPLLKKIPTAVLWGYFAFMAIESLPGNQFWERILLLFTAPSRRYKVLEEYHTTFVETVPFKTIAMFTLFQTTYLLVCF
			GITWIPIAGVLFPLMIMLLVPVRQYILPKLFKGAHLNDLDAAEYEESPAIPFNLAAQDIDVALGRTQSAEILDDMVTRSR
			GEIKRLNSPKITSSGGTPVTELKGIRSPCMSEKAYSPRVNELRHERSPLGGRDSPRMGEARPSKLGEGSTPK
Triticum aestivum	TaBOR3-5A	TraesCS5A02G501500	MDLLRSPVKGVVADVKGRAPWYKDDWLAGLRAGFGILAPTMYIFFASALPVIAFGEQLSNETNGILSTVETLASTAICGI
			IHAILGGQPMMIVGVAEPTIIMYTYLYNFAKKQPGLGERLYLAWAGWVCIWTAIMLFLLAMFNASNVISRFTRVAGELFG
			MLITVLFLQEAIKGIVSEFSMPKDAEISDRSSATYQFQWIYVNGLLGVIFSIGLLYSALKTRRARSWLYGIGWIRSFIAD
			YGVPLMVIVWTAFSHALPSGVPSGVPRRLFSPLPWESSSLGHWTVAKDLFSVPPVYIFAAIVPALMVAGLYFFDHSVASQ
			LAQQQEFNLKKPSAYHYDILVLGFMVLLCGLIGIPPANGVLPQSPMHTRSLAVLKGQLMRKKMLQTAKEGMSNRASSLEI
			YGKMHEVFIEMDNKQDADSVDNDLKSLKDAVLREGDEDGKLAREFDPRKHIEAHLPVRVNEQRLSNLLQSLLVGGCVAAM
			PVIKMIPTSVLWGYFAYMAIDSLPGNQFWERIQFLCIGASRRYKVLEGPHASFMESVSRRTIYVFTIFQIVYFLLCFGTT
			WIPIAGILFPLPFFLMILIRQYLLPKFFEPNDLRELDAAEYEELEGVQHEHTLLEEDGSFSGSCDSRIDAEILDELTTNR
			GELKHRVVCHREERHLQAHSNAVQPSV
Triticum aestivum	TaBOR1-5B	TraesCS5B02G091200	MEESFVPLRGIKNDVRGRLACYKQDWTGGFSAGIRILAPTTYIFFASAIPVISFGEQLERSTDGVLTAVQTLASTALCGI
			IHSIVGGQPLLILGVAEPTVIMYTFMFSFAKDRADLGPNLFLAWAGWVCVWTALLLFLLAVLGACSIINRFTRIAGELFG
			LLIAMLFMQQAIKGLVDEFGVPERENIKALQFVPSWRFANGMFAIVLSFGLLLTALRSRKARSWRYGAGWLRGFIADYGV
			PLMVLVWTGVSYIPHDSVPKGIPRRLFSPNPWSPGAYDNWTVIKDMLQVPVMYIIGAFMPATMIAVLYYFDHSVASQLAQ
			QAEFNLRKPPSFHYDLLLLGFLTLMCGLIGIPPSNGVIPQSPMHTKSLATLKHQILRNRLVATARQSMRQNASLSQLYNN
			MQDAYHQIQTPLIHQQQSVKGLNELKDSTVQLASSMGNFDAPVDETIFDIEKEIDDLLPMEVKEQRLSNFLQAVMVGGCV
			AAMPLLKKIPTAVLWGYFAFMAIESLPGNQFWERILLLFTAPSRRYKVLEEYHTTFVETVPFKTIAMFTLFQTTYLLVCF
			GITWIPIAGVLFPLMIMLLVPVRQYILPKLFKGAHLNDLDAAEYEESPAIPFNLAAQDIDVALGRTQSAEILDDMVTRSR
			GEIKRLNSPKITSSGGTPVTELKGIRSPCISEKAYSPRVAELRHERSPLGGRDSPRTGEARPSKLGEGSTPK
Triticum aestivum	TaBOR1-5D	TraesCS5D02G097600	MEESFVPLRGIKNDVRGRLACYKQDWTGGFSAGIRILAPTTYIFFASAIPVISFGEQLERSTDGVLTAVQTLASTALCGI
			IHSIVGGQPLLILGVAEPTVIMYTFMFSFAKDRADLGPNLFLAWAGWVCVWTALLLFLLAVLGACSIINRFTRIAGELFG
			LLIAMLFMQQAIKGLVDEFRIPERENIKALQYIPSWRFANGMFAIVLSFGLLLTALRSRKARSWRYGAGWLRGFIADYGV
			PLMVLVWTGVSYIPHDSVPKGIPRRLFSPNPWSPGAYDNWTVIKDMAQVPVMYIIGAFMPATMIAVLYYFDHSVASQLAQ
			QAEFNLRKPPSFHYDLLLLGFLTLMCGLIGIPPSNGVIPQSPMHTKSLATLKHQILRNRLVATARQSMRQNASLSQLYNN
			MQDAYHQIQTPLIHQQQSVKGLNELKDSTVQLASSMGNFDAPVDETIFDIEKEIDDLLPMEVKEQRLSNFLQAVMVGGCV
			AAMPLLKKIPTAVLWGYFAFMAIESLPGNQFWERILLLFTAPSRRYKVLEEYHTTFVETVPFKTIAMFTLFQTTYLLVCF
			GITWIPIAGVLFPLMIMLLVPVRQYILPKLFKGAHLNDLDAAEYEESPAIPFNLAAQDIDVALGRTQSAEILDDMVTRSR
			GEIKRLNSPKITSSGGTPVTELKGIRSPCISEKAYSPRVTELRHERSPLGGRDSPRTGEARTSKLGEGSTPK
Triticum aestivum	TaBOR3-7B	TraesCS7B02G475400	MDLLASPFKGVLHDVKGRAAWYKDDWLAGLHTGFRILAPTMYIFFASALPVIAFGEQLSHETNGMLSTVETLASTAICGI
			IHSILGGQPMMIVGVAEPTVIMYTYLYNFAKKQQSIGEALYLAWAGWVCIWTAIMLFLLATFNASNVISKFTRVAGELFG
			MLITVLFLQEASKGIVREFGPPKGVDNGSPIHQFQWMYLNGLLGVIFSTGLLYTALRTRRARSWLYGLGWLRSFIADYGV
			PLMVIVWTALSYALPSKVPSGVPRRLFSPLPWESSSLQHWTVAKDLFSVPPAFIFAAILPALMVAGLYFFDHSVASQLAQ
			QKEYNLKKPSAYHYDILVLGLMVLLCGLIGIPPSNGVLPQSPMHTRSLAVLRGQFLRKKMVETAKESVGNRASKMEIYGK
			LHEVFIEMDNEQNTGSVDMELKSLKEAVLRENGEDGEQTGEFDPRKHIEPHLPVRVNEQRLSNLLQSLMVGGCVAAMPVI
			RMIPTSVLWGYFAYMAIDSLPGNQFWERIQLIFISSSRRYKVLEGPHASFVESVPSRTTSAFTIFQFVYLLICFGITWIP
			IAGILFPLPFFLMIAIRQHLLPKFFEPSDLRELDTAEYEELEGFHQEGEAGSNLGSCHSSIDAEMLDELTTNRGELKHRT
			VSNREERHLQVHSNAVQPSV
Triticum aestivum	TaBOR3-7D	TraesCS7D02G724400LC	RAAWYKDDWLAGLRTGFRILAPTMYIFFASALPVIAFGEQLSHETNGMLSTVETLASTAICGIIHSILGGQPMMIVGVAE
			PTVIMYTYLYNFAKKQQRIGEALYLAWAGWVCIWTAIMLFLLATFNASNVISKFTRVAGELFGMLITVLFLQEAIKGIVR
			EFGPPKGVDDGSPIHQFQWMYLNGLLGVIFSTGLLYTALRTRRARSWLYGLGWLRSFIADYGVPLMVIVWTALSYALPSK
			VPSGVPRRLFSPLPWESSSLQHWTVAKDLFSVPPAFIFAAILPALMVAGLYFFDHSVASQLAQQKEYNLKKPSAYHYDIL
			VLGLTVLLCGLIGIPPSNGVLPQSPMHTRSLAVLRGQFLRKKMVQTAKESVVNRANRMEIYGKLHEVFVEMDNEQNTGSV
			DMELKSLKEAVLRENGEDGKPAGEFDPRKHIEPHLPVRVNEQRLSNLLQSLMVGGCVAAMPVIRMIPTSVLWGYFAYMAI
			DSLPGNQFWERIQLIFISSSRRYKVLEGPHASFVESVPSRTTSAFTIFQFVYLLICFGITWIPIAGILFPLPFFLMIAIR
			QHLLPKFFEPSDLRELDTAEYEELEGFHQEGEAGSNLGSCRSSIDAEMLDELTTNRGELKHRTVSNREERHIQVHSNAIQ
			PSV
Oryza sativa	OsBOR1	LOC_Os12g37840	MEESFVPLRGIKNDLHGRLQCYKQDWTGGFRAGIRILAPTTYIFFASAIPVISFGEQLERNTDGVLTAVQTLASTALCGI
			IHSFLGGQPLLILGVAEPTVLMYTFMFNFAKDRPDLGRRLFLAWTGWVCVWTAILLFLLAILGACSIINRFTRIAGELFG
			LLIAMLFMQQAIKGLVDEFRIPERENRKALEFVSSWRFANGMFAIVLSFGLLLTALRSRKARSWRYGTGWLRGFIADYGV
			PLMVLVWTGVSYIPYGSVPKGIPRRLFSPNPWSPGAYDNWTVIRDMPNVPLLYIIGAFIPATMIAVLYYFDHSVASQLAQ
			QKEFNLRKPPSFHYDLLLLGFLTLLCGLIGIPPANGVIPQSPMHTKSLATLKHQLLRNRLVATARQSMSQNASLSQLYGS
			MQEAYQQMQTPLIYQQPSVKGLNELKDSTVQMASSMGNIDAPVDETVFDIEKEIDDLLPIEVKEQRLSNLLQATMVGGCV
			AAMPLLKKIPTSVLWGYFAFMAIESLPGNQFWERILLLFTAPSRRYKVLEEYHTTFVETVPFKTIAMFTLFQTMYLLVCF
			GITWIPIAGVLFPLMIMLLVPVRQYILPKLFKGAHLTDLDAAEYEESPAIPFIAAQDIDVALARTQSAEILDDIVTRSRG
			EIKRLNSPKITSSGGTPVAELKGIRSPCISERAYSPCITELRHDRSPLGGRGSPRTGETRSSKLGEGSTPK
Oryza sativa	OsBOR3	LOC_Os01g08020	MELLKIPFKGVVADIEGRAAWYKHDWLEGFHSGFRILAPTMYIFFASALPVIAFGTQLSRETNGILTTVETLASTAICGI
			IHSILGGQPLLIVGVAEPTIIMYTYLYNFAKNQQALGERLYLAWAGWVCIWTAIMLFLLAMFNASNVISRFTRVAGELFG
			MLITVLFLQQAIKGIIEEFKVPGGVDHSSPIYRFQWLYVNGLLGVIFSIGLLYTALRSRRARSWVYGQGWLRGFISDYGV
			PLMVIVWTALSYALPKDVPSGVPRRLFSPLPWESSSLHHWTIAKDLFSVPPAYIFAAILPALMIAGLYFFDHSVASQLAQ
			QKEFNLKKPSAYHYDILVLGFMVLLCGLIGIPPSNGVLPQSPMHTRSLAVLKGQLLRKKMVQTANEGLMNRASSLEIYGK
			MQGVFIEMDCEKNTDSVDKELKSLKDAMLQEGDKEGTLAEEFDPIKHIEAHLPVRVNEQRLSNLLQSLLVGACVGAMPVI
			KMIPTSVLWGYFAYMAIDSLPGNQFWERIRLIFIPSSRRYKVLEGPHASFMESVPSKTITVFTIFQLVYLLICFGITWIP
			IAGILFPLPFFLMILIRQHVLPKFFEPNDLRELDAAEYEELEGVHHDHTLEDGASDSESCGSRDDAEILDELTTNRGELK
			HRTFNHREERHPQAHTKAVQPRCGDTENWSEC
Oryza sativa	OsBOR4	LOC_Os05g08430	MTGTVKAPFEGVVNDFKGRLSCYKQDWIDGFRTGFRILAPTLYIFFASALPVVAFGEQLSNDTDGALTTVETLASTAICG
			IIHSILGGQPLLIVGVAEPTIIMYTYIYNFAKNHPNLGERLFLPWAGWVCIWTAFMLFLMAMFNAAVVINRFTRFAGELF
			GMLITILFMQEAVKGMLGEFSVPEGKDHSLPIYQFQWAYVNGLLGIIFSMGLLYTAIRSRSARSSLYGTGWQRSFIADYG
			VPLMVVVWTALSYSLPSKIPSGVPRRLFTPLPWEPKSLQHWTVAKDLFSVPPPYIFLAIVPAVMVAGLYFFDHSVASQLA
			QQKEFNLKNPSAYHYDILVLSFMVLICGLIGIPPSNGVLPQSPMHTRSLAVLKGQLLRKKMVQTAKEGMMNNASSSEVYG
			KMQEVFIKMDDKSNAKSVRKELKELKDAVIPEGNGAGRVSEVFDPEKHIEAYLPVRVNEQRVSNLLQSLLIAGCVGVMPI
			IQKIPTSVLWGYFAYMSIDSVPGNQFWERTQLLFISPQRRYKLLEGAHASFMESVPIKKISAFTIFQLVYLLIVWGMTWI
			PVAGILFPLLFFFLIVIRQYILPKFFDPRHLWELDAAEYEELEGVRRDPSTDEDASVSRCSDASPEYASEILDEFTTNRG
			ELKHRTKSFRDERLIQLNSVKMTRELSRIPTFTPPRS
Brassica napus	BnaBOR1	GSBRNA2T00003348001	MEETFVPFEGIKNDLKGRLMCYKQDWTGGFKAGFRILAPTTYIFFASAIPVISFGEQLERNTDGVLTAVQTLASTAICGI
			IHSVIGGQPLLILGVAEPTVIMYTFMFNFAKARPELGRDLFLAWSGWVCVWTALMLFVMAICGACSIINRFTRVAGELFG
			LLIAMLFMQQAIKGLVDEFRIPERENEKLKEFLPSWRFANGMFALVLSFGLLLTGLRSRKARSWRYGTAGWLRSLVADYG
			VPLMVLVWTGVSYIPSGDVPKGIPRRLFSPNPWSPGAYGNWTVVQEMLDVPVVYIIGAFIPASMIAVLYYFDHSVASQLA
			QQKEFNLRKPSSYHYDLLLLGFLTLMCGLLGVPPSNGVIPQSPMHTKSLATLKYQLLRNRLVATARKSIKTNASLGQLYN
			NMQEAYHHMQTPLVYQQPQGLKELKESTIQATTFTGNLNAPVDETLFDIEKEIDDLLPVEVKEQRVSNFLQSTMVGGCVA
			AMPILKMIPTSVLWGYFAFMAIESLPGNQFWERILLLFTAPSRRFKVLEDYHATFVETVPFKAIAMFTVFQTVYLLICFG
			LTWIPIAGVMFPLMIMFLIPVRQYILPRFFKGAHLQDLDAAEYEEAPALPFNLAAETEIGSTTSYPGDSEILDEVITRSR
			GEFRHTSSPKVTSSSSTPLNNRSLSSPRVGEIRLSQMSPRVVGNSPKPASCGRSPLNQSSLN
Brassica napus	BnaBOR2	GSBRNA2T00093109001	GLILVIIIVETGWLRSLIADYGVPLMVLVWTGVSYIPTGDVPKGIPRRLFSPNPWSPGAYENWTVVKEMLQVPVVYIIGA
			FIPATMIAVLYYFDHSVASQLAQQKEFNLRKPSSYHYDLLLLGFLTLICGLLGIPPSNGVIPQSPMHTKSLATLKYQLLR
			NRLVATARRSIKQNASLGQLYGNMQEAYNQMQTPLVYQQPQGLKELRESTIQATTFTGNLDAPVDETLFDIEKEIDDLLP
			IEVKEQRVSNLLQALMVGGCVAAMPILKMIPTSVLWGYFAFMAIESLPGNQFWERILLLFTAPSRRFKVLEDNHATFVET
			VPFKTIAMFTIFQTTYLLICFGLTWIPIAGVMFPLMIMFLIPVRQYILPRFFKGAHLQDLDAAEYEEAPALPFNLAVAED
			EMGSTASYPCDSEILDEVMTRSRGEFRHTCSPKVTSSTSTPVYHRNLSQVFSPRVNELRGGGMMSPSLAGKGHNSPKPSP
			LNPSSSSPSK
Brassica napus	BnaBOR3	GSBRNA2T00111858001	MAEAESFVPFQGIKNDIKGRLRCYKHDWISGFRAGFRILAPTTYIFFASAIPVITFGEQLERDTDGKITAVQTLVSTALC
			GVIHSIIGGQPLLILGVAEPTVIMYTFMFNFAKNRQDLGSNLFLAWTGWVCLWTGLLLFLLAILGACSFINRFTRLAGEL
			FGILIAMLFMQEAIRGVVDEFGVPGRTNPTSAQFQPAWVFANGMFGLVLSFGLLYTALKSRKARSWRFGAEWLRGFIADY
			GVPVMVVVWTCVSYIPWKSVPQGIPRRLVSPNPWSPGAYQNWTVIKEMLDVPVVYIILALVPASMIAVLYYFDHSVASQL
			AQQEDFNLRKPPSFHYDLLLLGFLTILCGLLGIPPSNGVIPQSPMHTKSLATLKHQLLRNKLVAAARKCIRNKATLGEVY
			GSMEEAYQQMQSPLIHQGPSRIQGLKQSQMQKGLGLANADTLVDEAVFDVETEVENVLPVEVKEQRLSNFLQAMLVAGCV
			AAMPLIKRIPSSVLWGYFAYMAIESLPGNQFWERIVLLFTAPSRRFKVLEDNHAVFVETVPFKTMAMFTLFQTGYLLVCF
			GITWVPVAGVLFPLMIMFLVPVRQYVLPNFFKGAHLQDLDAAEYEEAPALLSFNLKPEGEVSRATSFADSGEVMDGMFTR
			SRGEIRRVNSIKLAGSVGGGSTGGSPAGGVELMRRVVSFQNPRVSEKVYIRSLSDYRGGGESSPRSPAGRAPLSPRFAAA
			GGGGGGGEQRLSNLGKSV
Brassica napus	BnaBOR4	GSBRNA2T00083145001	MAEAESFVPFQGIKNDIKGRLRCYKHDWISGFRAGFRILAPTTYIFFASAIPVITFGEQLERDTDGKITAVQTLVSTALC
			GVIHSIIGGQPLLILGVAEPTVIMYTFMFNFAKNRQDLGSNLFLAWTGWVCLWTGLLLFLLAILGACSFINRFTRLAGEL
			FGILIAMLFMQEAIRGVVDEFGVPGRTNPTSAQFQPAWVFANGMFGLVLSFGLLYTALKSRKARSWRFGAEWLRGFIADY
			GVPVMVVVWTCVSYIPWKSVPQGIPRRLVSPNPWSPGAYQNWTVIKEMLDVPVVYIILALVPASMIAVLYYFDHSVASQL
			AQQEDFNLRKPPSFHYDLLLLGFLTILCGLLGIPPSNGVIPQSPMHTKSLATLKHQLLRNKLVAAARKCIRNKATLGEVY
			GSMEEAYQQMQSPLIHQGPSRIQGLKQSQMQKGLGLANADTLVDEAVFDVETEVENVLPVEVKEQRLSNFLQAMLVAGCV
			AAMPLIKRIPSSVLWGYFAYMAIESLPGNQFWERIVLLFTAPSRRFKVLEDNHAVFVETVPFKTMAMFTLFQTGYLLVCF
			GITWVPVAGVLFPLMIMFLVPVRQYVLPNFFKGAHLQDLDAAEYEEAPALLSFNLKPEGEVSRATSFADSGEVMDGMFTR
			SRGEIRRVNSIKLAGSVGGGSTGGSPAGGVELMRRVVSFQNPRVSEKVYIRSLSDYRGGGESSPRSPAGRAPLSPRFAAA
			GGGGGGGEQRLSNLGKSV
Brassica napus	BnaBOR6	GSBRNA2T00147638001	MESEGGPFKGILRDIEGRRKCYKQDWILGFKTGLRILAPTCYIFFASSLPVVAFGEQLSKHTGGSLSAVETLASTSICGI
			IHAIFGGQPLLILGVAEPTIMMYTYLYSFCISRPDLGRELYLAWVAWVCVWTAIFLILLSIFNACTIISRFTRIAGELFG
			MLIAVLFLQEAIKGLVSEFQASKSEHHDKSGESDFLWLYTNGLLAVIFSLGLLITALKSRRAKSWKYGFGWLRSFIGDYG
			VPLMVLFWTALSYTVPSKVPENVPRRLFCPLPWETASLHHWTVIKDMGKVPVIYIFAGIIPAVMIAGLYFFDHSVASQMA
			QQKEFNLKNPSAYHYDIFLLGIMTLICGLLGLPPSNGVIPQAPMHTKSLAILNRQLTRKKMVKSAKEGMKMKASKSEIYG
			RMQTVFIEMETSSPQVCSVANDLKDLKEVVMRPDEGGDTKGKFDPDVHIEANLPVRVNEQRVSNLLQSVLVGLTLLAVPV
			IKMIPSSVLWGYFAYMAIDSLPGNQFWERLLLLFIPQSRLFKVLEGVHASFVELVPYKVIVMFTLFQLVYFLLCYGMTWV
			PVAGIFFPALFFLLISIREHLLPKLFDPQHLQVLDAADYEEIVAAPIQHSSFAYRKLGSSRHLSEGEEEDEFHDAEILDE
			MTTSRGEIRIRTISLKEPRLESEERRVTFEPH
Arabidopsis	AtBOR1	At2g47160	MEETFVPFEGIKNDLKGRLMCYKQDWTGGFKAGFRILAPTTYIFFASAIPVISFGEQLERSTGNSAKSFYLALFQLRNLK
			LDSEIFADGVLTAVQTLASTAICGMIHSIIGGQPLLILGVAEPTVIMYTFMFNFAKARPELGRDLFLAWSGWVCVWTALM
			LFVLAICGACSIINRFTRVAGELFGLLIAMLFMQQAIKGLVDEFRIPERENQKLKEFLPSWRFANGMFALVLSFGLLLTG
			LRSRKARSWRYGTGWLRSLIADYGVPLMVLVWTGVSYIPAGDVPKGIPRRLFSPNPWSPGAYGNWTVVKEMLDVPIVYII
			GAFIPASMIAVLYYFDHSVASQLAQQKEFNLRKPSSYHYDLLLLGFLTLMCGLLGVPPSNGVIPQSPMHTKSLATLKYQL
			LRNRLVATARRSIKTNASLGQLYDNMQEAYHHMQTPLVYQQPQGLKELKESTIQATTFTGNLNAPVDETLFDIEKEIDDL
			LPVEVKEQRVSNLLQSTMVGGCVAAMPILKMIPTSVLWGYFAFMAIESLPGNQFWERILLLFTAPSRRFKVLEDYHATFV
			ETVPFKTIAMFTLFQTTYLLICFGLTWIPIAGVMFPLMIMFLIPVRQYLLPRFFKGAHLQDLDAAEYEEAPALPFNLAAE
			TEIGSTTSYPGDLEILDEVMTRSRGEFRHTSSPKVTSSSSTPVNNRSLSQVFSPRVSGIRLGQMSPRVVGNSPKPASCGR
			SPLNQSSSN
Arabidopsis	AtBOR2	At3g62270	MEETFVPFEGIKNDLKGRLMCYKQDWTGGIKAGFRILAPTTYIFFASAIPVISFGEQLERSTDGVLTAVQTLASTAICGI
			IHSIIGGQPLLILGVAEPTVIMYTFMFNFAKGRPELGRNLFLAWSGWVCVWTSLILFVLAICGACSFINRFTRVAGELFG
			LLIAMLFMQQAIKGLVDEFRAPAREDLKLVEFLPSWRFANGMFALVLSFGLLITALRSRKARSWRYGTGWLRSLVADYGV
			PLMVLVWTGVSYIPTGDVPKGIPRRLFSPNPWSPGAYENWTVVKEMLQVPIVYIIGAFIPATMIAVLYYFDHSVASQLAQ
			QKEFNLRKPSSYHYDLLLLGFLTLMCGLLGIPPSNGVIPQSPMHTKSLATLKYQLLRNRLVATARKSIKQNASLGQLYGN
			MQDVYNQMQTPLVYQQPQGLKELRESTIQATTFTGNLDAPVDETLFDIEKEIDDLLPIEVKEQRVSNLLQAVMVGGCVAA
			MPLLKMIPTSVLWGYFAFMAIESLPGNQFWERILLLFTAPSRRFKVLEDNHATFVETVPFKTIAMFTIFQTTYLLTCFGL
			TWIPIAGVMFPLLIMFLIPVRQYILPRFFKSAHLQDLDAAEYEEAPALPFHLAVPEAEMGSTASYPCDSEILDEFITRSR
			GEFRHTCSPKVTSSTSTPVYNRNLSQVFSPRVIDLRGEMSPRLSGKGQNSPKPSPLNPSSSSK
Arabidopsis	AtBOR3	At3g06450	MDEAESFVPFQGIKKDVKGRLNCYKQDWISGLRAGFRILAPTTYIFFASAIPVITFGEQLERDTDGKITAVQTLVSTALC
			GVIHSIIGGQPLLILGVAEPTVIMYTFMFNFAKSRTDLGSNLFLAWTGWVCLWTGLLLFLLAVLGACTFINRFTRLAGEL
			FGILIAMLFMQEAIRGIVDEFGVPGRTNPRSAEFQPAWVFANGMFGLVLSSGLLYTGLKSRKARSWRFGAEWLRGFIADY
			GVPVMVVVWTCISYIPWKSVPQGIPRRLVSPNPWSPGAYQNWTVIKEMVDVPVLYILLAVVPASMIAVLYYFDHSVASQL
			AQQEDFNLRKPPAYHYDLFLLGFLTILCGLIGIPPSNGVIPQSPMHTKSLATLNHQLLRNKLVAAARKCIRNNATIGEVY
			GSMEEAYQQMQSPLIHQEPSRIQGLKQSHIQKASNADALVDETVFDIETEVENILPVEVKEQRVSNFLQAMMVAGCVAAM
			PLIKRIPSSVLWGYFAYMAIESLPGNQFWERIVLLFTAPSRRFKVLEDNHAVFIETVPFKTMAMFTLFQTAYLLVCFGIT
			WVPVAGVLFPLMIMFLVPVRQYVLPNFFKGAHLQDLDAAEYEEAPAILSFNLKPEGEVSRATSFADSGEVMDGMFTRSRG
			EIRKVSSLKLGGGGSGSTVGSPAGGGVELMRRVVSFQNPRVSEKVYIRSLSDFRGGGEISPRSSAGRAPFSPRSATGGGG
			GEQRLSNLGKSV
Arabidopsis	AtBOR4	At1g15460	MEEERVDSSKRLFRGIVADLRGRALCYKEDWVAGLRSGFGILAPTTYIFFASALPVIAFGEQLSRDTEGALSTVETLAST
			ALCGVIHSILGGQPLLILGVAEPTVLMYVYLYNFAIGRPELGKQLYLAWAAWVCVWTALLLFVMAILNTADIINRFTRVA
			GELFGMLISVLFIQQAIKGMVSEFGMPKDEDSKLEKYKFEWLYTNGLLGLIFTFGLLYTALKSRKARSWRYGTGWYRSFI
			ADYGVPLMVVVWTALSFSTPSKLPSGVPRRLFSPLPWDSPSLSHWTVIKDMGKVSPGYIFAAFIPALMIAGLYFFDHSVA
			SQLAQQKEFNLKKPSAYHYDILLLGFMTLICGLLGLPPSNGVLPQSPMHTKSLAVLKRQLIRRKMVKTAKESIRKRETSS
			QVYENMQEVFIEMDKSPLAQTDPSVIIELQDLKEAVMKSNDEEREGDEESGFDPEKHLDAYLPVRVNEQRVSNLLQSLLV
			AGAVLAMPAIKLIPTSILWGYFAYMAIDSLPGNQFFERLTLLFVPTSRRFKVLEGAHASFVEKVPYKSMAAFTLLQIFYF
			GLCYGVTWIPVAGIMFPVPFFLLIAIRQYILPKLFNPAHLRELDAAEYEEIPGTPRNPLELSFRSNDSKRGVQEGDAEIL
			DELTTSRGELKVRTLNLNEDKGNQIYPKEKVKAGDGDMSTTRE
Arabidopsis	AtBOR5	At1g74810	MEEERVEGSKRPFQGIIRDVKGRALCYKQDWIAGLRSGFGILAPTTYVFFASALPVIAFGEQLSHDTERSLSTVETLAST
			ALCGVIHSLLGGQPLLILGVAEPTVLMYKYLYDFAKGRPELGKQLYLAWVAWVCVWTALLLFLMAIFNMAYIINRFTRIA
			GELFGMLIAVLFLQQTIKGMVSEFRIPKGEDSKLEKYQFEWLYTNGLLGLIFTVGLVYTALKSRKARSWPYGTGCCRSFV
			ADYGVPLMVVVWTALSFSTPSKLPSGVPRRLVSPLPWDSVSLTHWTVIKDMGKVSPGYIFAAFIPALMIAGLYFFDHSVV
			SQLAQQKEFNLKNPSAYHYDILLLGFMVLICGMLGLPPSNGVLPQSPMHTKSLAVFKRQLMRRKMVMTAKESIRQKATSS
			QVYEDMEQVFIEMDKSPLAETHTTLINELQDLKEAVMKKSDDDGDTGEESGFDPEKHVDAYLPVRVNEQRVSNLLQSLLV
			IGAVFALPVIKLIPTSLLWGYFAYMAIDSLPDNQFFERTVLLFVPPTRRFKVLEGAHASFVEKVPHKSIAAFTLFQILYF
			GLCYGVTWIPVAGIMFPVLFFLLVAIRQYLLPKLFKPAYLRELDAAEYEEIPGTPRNPLELSFRSNNSARGVQECDAEIL
			DELTTSRGELKVRTLGHNEDKGHQIYPKEIVEVGDGDMSSSRE
Arabidopsis	AtBOR6	At5g25430	MKSEGESGPFQGILRDIEGRRKCYKQDWIRGIKTGIRILAPTCYIFFASSLPVVAFGEQLSKHTGGALSAVETLASTSIC
			GIIHAIFGGQPLLIVGVAEPTIIMYTYLYSFCISRPDIGRELYLAWVAWVCVWTSVLLILLSIFNAGTIITRFTRIAGEL
			FGMLIAVLFLQEAIKGLISEFHAPEIKNQETGKSHFLLIYANGLLAVIFSLGLLITALKSRRAKSWKYGFGWLRSFIGDY
			GVPLMVLLWTALSYTVPSEVLPSVPRRLFCPLPWEPASLYHWTVVKDMGKVPIMYILAAFIPGVMIAGLYFFDHSVASQM
			AQQKEFNLKNPSAYHYDIFLLGIITLICGLLGLPPSNGVLPQAPMHTKSLAVLNRQLIRKKMVKKAKECMKMKASKSEIY
			GRMQSVFIEMETSPPQDNSVATDLKELKEVVMRPDEGGDTKGKFDPDVHIEANLPVRVNEQRVSNLLQSVLVGLTLLAVT
			VIKMIPSSVLWGYFAYMAIDSLPGNQFWERLLLLFIPPSRLFKVLEGVHASFVELVPYRVIVTFTLFQLVYFLLCYGMTW
			IPMAGIFFPALFFLLISIREHLLPKLFDMQHLQVLDASDYEEIVAAPIQHSSFAYRKLGSSHHLSEGEDEFYDAEILDEM
			TTSRGEIRIRTISFKEVHPEPEEKHVTFEPH
Arabidopsis	AtBOR7	At4g32510	MEGVKFPFGGIINDFNGRRKCYKQDWLAAFNSGVRILAPTLYIFIASALPVIAFGEQLSRETDRSLGIAESLASTALCGI
			IHSVFGGQPLLIVGVAEPTIIMYTYLHSFSKSRPELGQKLYLAWAGWVCVWTAVLLMLLAMLNACNIISRFTRIAGELFG
			MLITVLFIQEAVKGLIGEFLVPKSDDPSLEVYQFQWRYTNGLLAVIFSFGLLYTALKSRRARSWKYGFRWMRGFIGDYGT
			LLMLVLWSAFSYTVPRNLPEGVPRRLELPLPWASESLYHWTVVKDMAKVPPLYILAAFIPAIMIAGLYFFDHCVSAQMAQ
			QKEFNLKNPTAYHYDIFILGIMTLICGLLGLPPSNGVIPQSPMHTKSLAVLKKQQMRKKMVQKAKECMREKASNSEIYGR
			MQDVFIEMETSPKATSVVKELENLKEAVMKADDGGGETKGKKFDPEVHIEDHLPVRVNEQRVSNLLQSVLVGLLILAVPV
			LRMIPTSVLWGYFTYMAVDSLPGNQFWERLQLLFITPGRRFKVLEGLHASFVEIVPYKSIVMFTLFQLLYFLICYGVTWI
			PVGGILFPLPFFILIALRQYILQRLFDPSHLQVLDSSEYEEMVGAPQRNSSFGFNGELREAHNIPLSVVENSEDEFYDAE
			ILDEITTSRGELKHRTLSVKEDRSQMVKIYNHS
Hordeum vulgare	HvBOR1	HORVU.MOREX.r3.5HG0442770.1	MEESFVPLRGIKNDLRGRLTCYKQDWTGGFSAGIRILAPTTYIFFASAIPVISFGEQLERSTDGVLTAVQTLASTALCGI
			IHSVVGGQPLLILGVAEPTVIMYTFMFSFAKDRADLGPNLFLAWAGWVCVWTAVLLFLLAVLGACSIINRFTRIAGELFG
			LLIAMLFMQQAIKGLVDEFRIPERENIKALQFVPSWRFANGMFAIVLSFGLLLTALRSRKARSWRYGAGWLRGFIADYGV
			PLMVLVWTGVSYIPHDSVPKGIPRRLFSPNPWSPGAYDNWTVIQDMPNVPLMYIIGAFMPATMIAVLYYFDHSVASQLAQ
			QAEFNLRKPPSFHYDLLLLGFLTLLCGLIGIPPSNGVIPQSPMHTKSLATLKHQILRNRLVATARQSMRQNASLSQLYNS
			MQDAYHQIQTPLIHQQQSVKGLNELKDSTVQLASSMGNFDAPVDETIFDIEKEIDDLLPMEVKEQRLSNFLQAVMVGGCI
			AAMPLLKKIPTAVLWGYFAFMAIESLPGNQFWERILLLFTAPSRRYKVLEEYHTTFVETVPFKTIAMFTLFQTTYLLVCF
			GITWIPIAGVLFPLMIMLLVPVRQYILPKLFKGAHLNDLDAAEYEESPAIPFNLAAQDIDVALGHTQSAEILDDMVTRSR
			GEIKRLNSPKITSSGGTPVTELKGIRSPCISEKAYSPRITELRHERSPLGGRDSPRTGEARPSKLGEGSTPK
Hordeum vulgare	HvBOR3-3H	HORVU3Hr1G023560.1	MDLLGNPFKGVVADVKGRASWYKDDWVAGLRTGFRILAPTMYIFFASALPVISFGEQLSNETDGIVSTVETLASTAICGI
			IHSILGGQPLLIVGVAEPTIIMYTYLYKFAKKQPDLGERLYLAWAGWVCIWTAIMLFLLAMFNASNVISRFTRVAGELFG
			MLITVLFLQQAIKGIVSEFSVPKDDEISDPSSPIYQFQWIYVNGLLGVIFSIGLLYTALKTRRARSWLYGVGWLRSFIAD
			YGVPLMVIVWTALSFTLPSKVPSGVPRRLFSPLPWESISLRHWTVAKDLFSVPPTYIFAAIVPALMVAGLYFFDHSVASQ
			LAQQKEFNLKKASAYHYDILVLGFMVLLCGLLGIPPSNGVLPQSPMHTRSLAVLKGQLLRRKMLQTAKEGMSNRASSLEI
			YGKMQEVFIQMDSNQNANSVDKDLKSLKDAVLREGDEEGKLAGEFDPSKHIEAHLPVRVNEQRLSNLLQSLLVGGCVGAM
			PAIKMIPTSVLWGYFAYMAIDSLPGNQFWERLQLLCIGASRRYKVLEGPHASFVEAVPSRTISAFTVFQFVYLLICFGIT
			WIPVAGILFPLPFFIMILIRQHLLPKFFEPNDLRELDAAEYEELEGVPHEQTLEEDGSNSGSHDSIDDAEMLDELTTNRG
			ELKHRSASHPEERHLQVQPTD
Hordeum vulgare	HvBOR4	HORVU.MOREX.r3.1HG0027400.1	MAMEPKKTLFKGVIEDFGGRAACYKQDWHNGFSSGFRILAPTLYIFFASALPVIAFGEQLSKDTDGTLTTVETLASTALC
			GIIHSLLGGQPLLIVGVAEPTIIMYTYIYNFAKNQPNLGERLFLAWAGWVCIWTAVMLFLMAMFNAAAALNRFTRFAGEL
			FGMLITILFMQQAIKGMLSEFSVPEDKDQSLPIYQFHWVYINGLLGVIFSMGLLYTALRSRSARSSLYGTGWLRNLIADY
			GVPLMVILWTALSYSLPSKIPSGVPRRLFTPLPWEPKSLQHWTVAKDLFSVPPNYIFLAIVPAVMVAGLYFFDHSVASQM
			AQQKEFNLKNPSAYHYDIMVLSCSVLICGLLGIPPSNGVLPQAPMHTRSLAVLRRQALRKQMVRTAKEGMMNNASSSEVY
			GKMQEVFIKMDDKGSEGSAHKELKELKDAVITEGNGAGSGPEVFDPEKHLEAYLPVRVNEQRVSNLLQSLLVAGCVGIVP
			VIQRIPTSVLWGYFAYMSIDSLPGNQFWERIQLLFIAPQRRYKVLEGAHASFLESVPFNKILAFTIFQLIYLLIVWGMTW
			IPVAGILFPLLFFFLVVIREHFLPKFFAARHLWELDASEYEECEGMRRDPSISEGDGEAPAEYASEVMEEFTTHRGELKH
			RAPSFRDERLIRLNSVQMTRQFSRISSLTPTRP
Hordeum vulgare	HvBOR3-4H	HORVU.MOREX.r3.4HG0409380.1	MDLLRNPFKGVVADVKGRAPWYKDDWLAGLRAGFGILAPTMYIFFASALPVIAFGEQLSNETNGILSTVETLASTAICGI
			IHAILGGQPMMIVGVAEPTIIMYTYLYSFAKKQPGLGERLYLAWAGWVCIWTAIMLFLLAMFNASNVISRFTRVAGELFG
			MLITVLFLQEAIKGIVGEFSMPKDAEIFDRSSPIYQFQWIYVNGLLGVIFSIGLLYSALKTRRARSWLYGIGWLRSFIAD
			YGVPLMVIVWTAFSYALPSGVPSGVPRRLFSPLPWESSSLGHWTVAKDLFSVPPAYIFAAIVPALMVAGLYFFDHSVASQ
			LAQQQEFNLKKPSAYHYDILVLGFMVLLCGLIGIPPANGVLPQSPMHTRSLAVLKGQLMRKRMLRTAKEGMSNRASSLEI
			YGKMHEVFIEMDNKQDADSVDKDLKSLKDAVLREGDEDGKLAGEFDPRKHIEAHLPVRVNEQRLSNLLQSLLVGGCVGAM
			PVIKMIPTSVLWGYFAYMAIDSLPGNQFWERIQLLFVGASRRYKVLEGPHASFVESVSSRTIYVFTIFQIVYFLICFGTT
			WIPIAGILFPLPFFLMILIRQYLLPKFFEPNDLRELDAAEYDELEGVQHEHTLEEDGSISGSCDGRIDAEILDELTTHRG
			ELKHRVVSHREERHLQVHSNAVQPSV
Sorghum bicolor	SbBOR1	Sobic.008G132300.1.p	MEESFVPLRGIKDDLHGRLACYKQDWTGGFRAGIRILAPTTYIFFASAIPVISFGEQLERNTDGVLTAVQTLASTAVCGI
			IHSIVGGQPLLILGVAEPTVLMYTFMFNFAKDRPDLGRNLFLAWTGWVCVWTAILLFLLAILGACSIINRFTRIAGELFG
			LLIAMLFMQQAIKGLVDEFRIPERENRKALEFVPSWRFANGMFAIVLSFGLLLTALRSRKARSWRYGTGWLRGFIADYGV
			PLMVLVWTGVSYIPYGNVPKGIPRRLFSPNPWSPGAYDNWTVIKDMTQVPLLYILGAFIPATMIAVLYYFDHSVASQLAQ
			QKEFNLRKPPSFHYDLLLLGFLTLMCGLIGIPPSNGVIPQSPMHTKSLATLKHQLLRNRLVATARKSMSQNASLSQLYGS
			MQDAYQQMQTPLVYQQQSVRRGLNELKDSTVQLASSMGNIDAPVDETVFDIEKEIDDLLPIEVKEQRLSNLLQASMVGGC
			VAAMPLLKKIPTSVLWGYFAFMAIESLPGNQFWERILLLFTAPSRRYKVLEEYHTTFVETVPFKTIAMFTLFQTMYLLVC
			FGITWIPIAGVLFPLMIMLLVPVRQYILPKLFKGAHLTDLDAAEYEESPAIPFSLAAQDIDVALGRTQSAEILDDMVTRS
			RGEIKRLNSPKITSSGGTPVAELKGIRSPSISEKAYSPRLTELRHERSPLGGRNSPRTPSKLGEGSTPK
Sorghum bicolor	SbBOR3	Sobic.003G047900.1.p	MDLLRHPFKGVVTDIKGRATWYKHDWVAGVHSGFRILAPTMYIFFASALPVIAFGAQLSTATNGILTTVETLASTAICGI
			IHSILGGQPLLIVGVAEPTIIMYTYLYNFAKNQQALGEKLYLAWAGWVCIWTAIMLFLLAMFNASNVISRFTRVAGELFG
			MLITVLFLQEAIKGMISEFSVPEDADSSSPIYQFQWLYVNGLLGVIFSIGLLYTALRTRRARSWLYGIRRLRSFIADYGV
			PLMVIVWTALSYTLPGKLPSGVPRRLFSPLPWESSSQGHWTIARDLFSVPPAYILAAILPALMVAGLYFFDHSVASQLAQ
			QKEYNLKKPSAYHYDILVLGIMVLLCGLLGIPPSNGVLPQSPMHTKSLAVLKRQLLSKKMVDTAKDSIGRSATTLEIYGK
			MEEIFIEMDSEQNTGSVDKELKNFKDAVLQEGNEEGKLAREFDPRKHIEAHLPVRVNEQRLSNLLQSILVGGCVGAMPVI
			RMIPTSVLWGYFAYMAIDSLPGNQFWERIQLLFVAESRLYKVLEGPHASFVESVVPKTITIFTIFQLVYLLICFGITWIP
			IAGILFPVPFFLMILIRQYLLPKFFDPIVLRELDAAEYEELDGIALEHNLEDEVSEVASCPSRPDAEILDELTTNRGEVK
			HRTSSLREERPIQVATNAVQPSL
Sorghum bicolor	SbBOR4	Sobic.009G064200.3.p	MSGPNKAPFSGVAEDLKGRAACYKQDWNHGFRSGLRILAPTLYIFFASAVPVIAFGEQLSKDTDGTLTTVETLASTAICG
			IIQSIIGGQPLLIVGVAEPTIIMYTYIYNFAKNQPNLGEKMFLPWAAWVCIWTAVMLFLMAMFNVAAILNRFTRFSGELF
			GMLITVLFMQEAIKGMLGEFSAPEGNDQSQPIFQFQWLYINGLLGLIFSMGVLYTSLSSGSARSSLYGTGWQRSLIADYG
			VPLIVILWTALSYSLPSKIPSGVPRRLFTPLPWEPKSLQHWTVAKDLFSVPPAHIFLAIVPAAMVAGLYFFDHSVASQMA
			QQKEFNLKNPSAYHYDILVLSLTTLICGLLGIPPSNGVLPQSPMHTRSLAVLKRQLLRKKMVQTAKEGMMNNATSSEVYG
			KMQDVFIKMDHGGDTVSAHKELKDLKDAIIPEGNGAGTVPEVFDPEKHVDAYLPVRVNEQRVSNLLQSLLIAGCIGITPL
			IQRIPTSVLWGYFAYMSIDSLPGNQFWERIKLLFITPQRRYKVLEGAHASFMESVPFNTICAFTAFQLIYLLIVFGMTWI
			PVAGILFPLLFFFLIVIRQHLIPKYFDPSHLRELDAAEYEELEGFTPDPSVCEDESVRSRDAQPGYASEILEEFTTHRGE
			LKRRNSSFRDGRLLQLNSVRMTRELSRAPSRIELSRAPSRVPRVMEQ
Zea mays	ZmBOR1-1	Zm00001d030656_P001	MEESFVPLRGIKDDLHGRLACYKQDWTGGFRAGIRILAPTTYIFFASAIPVISFGEQLERNTDGVLTAVQTLASTALCGI
			IHSIVGGQPLLILGVAEPTVLMYTFMFNFAKDRPDLGRNLFLAWTGWVCVWTAILLFLLAILGACSIINRFTRIAGELFG
			LLIAMLFMQQAIKGLVDEFRVPERENTKALEFVPSWRFANGMFAIVLSFGLLLTALRSRKARSWRYGTGWLRGFIADYGV
			PLMVLVWTGVSYIPYGNVPKGIPRRLFSPNPWSPGAYDNWTVVKDMTQVPLLYILGAFIPATMIAVLYYFDHSVASQLAQ
			QKEFNLRKPPSFHYDLLLLGFLTLMCGLIGIPPSNGVIPQSPMHTKSLATLKHQILRNRLVATARKGMSQNASLSQLYGS
			MQDAYQQMQTPLVYQQQSVRRGLNELKDSTVQLASSMGNIDAPVDETVFDIEKEIDDLLPIEVKEQRLSNLLQASMVVGC
			VAAMPLLKKIPTSVLWGYFAFMAIESLPGNQFWERILLLFTAPSRRYKVLEEYHTTFVETVPFKTIAMFTVFQTAYLLVC
			FGITWIPIAGVLFPLMIMLLVPVRQYILPKLFKGAHLTDLDAAEYEESPAIPFSLAAQDIDVALGRSQSAEILDDMVTRS
			RGEIKRLNSPKITSSGGTPVAELKGIRSPSISEKAYSPRLTELQHERSPLGGRSRPRTPSKLGEGSAPK
Zea mays	ZmBOR1-2	Zm00001d042982_P001	MEESFVPLRGIKNDLHGRLACYKQDWAGGFRAGIRILAPTTYIFFASAIPVISFGEQLERNTDGVLTAVQTLASTALCGV
			IHSIVGGQPLLILGVAEPTVLMYTFMFSFAKDRPDLGRSLFLAWTGWVCVWTAILLFLLAILGACSIINRFTRVAGELFG
			LLIAMLFMQQAIKGLIDEFRIPEREDRKALEFVPSWRFANGMFAIVLSFGLLLTALRSRKARSWRYGAGWLRGFIADYGV
			PLMVLVWTGVSYIPYGNVPKAIPRRLFSPNPWSPGAYDNWTVIKDMTQVPLLYIIGAFIPATMIAVLYYFDHSVASQLAQ
			QKEFNLRKPPSFHYDLLLLGFLTLMCGLIGIPPSNGVIPQSPMHTKSLATLKHQLLRNRLVATARKSMSQNASLSQLYGS
			MQDAYQQMQTPLVYQQQSVRRGLNELKDSTVQLASSMGNIDAPVDETVFDIEKEIDDLLPIEVKEQRLSNLLQASMVGGC
			VAAMPLLKKIPTSVLWGYFAFMAIESLPGNQFWERILLLFTAPSRRYKVLEEYHTTFVETVPFKTIAMFTMFQTAYLLVC
			FGITWIPIAGVLFPLMIMLLVPVRQYILPKLFKGAHLTDLDAAEYEESPAIPFSLAAQDIDVAFGNTQSAEILDNMVTRS
			RGEIKRINSPKITSSGGTPVAELKGIRSPSISEKAYSPRVIELWHERSPRTPSMLGEGSTPK
Zea mays	ZmBOR3	Zm00001d039647_P001	MDLLRHPFKGVVTDIKGRATWYKHDWVAGLHSGFRILAPTMYIFFASALPVIAFGAQLSTATNGILSTVETLASTAICGI
			IHSILGGQPLLIVGVAEPTIIMYTYLYNFAKNHQALGEQLYLAWTGWVCIWTAIMLFLLATFNASNVISRFTRIAGELFG
			MLITVLFLQEAIKGMISEFSVPEDADSSSPIYQFQWLYVNGLLGVIFSIGLLYTALRTRRARSWLYGTGWFRSFIADYGV
			PLMVIVWTGLSYLHPGKVPSGVPRRLSSPLPWESSSLGHWTTARDLFSVPPAYIFGAILPAFMVAGLYFFDHSVASQLAQ
			QKEYNLKKPSAYHYDILVLGFVVLLCGLLGIPPSNGVLPQSPMHTKSLAVLKRQLLSKKMVDTAKESIGGSATSLEIYGK
			MEEVFIKMDSEQNTDSVDRELKNFKDAVLQEGDEEGRLAREFDPRKHIEAHLPVRVNEQRLSNLLQSILVGGCVGAMPVI
			RMIPTSVLWGYFAYMAIDSLPGNQFWERIQLLFITESRRYKVLEGPHASFVESVVPKTVTIFTIFQLVYLLICFGITWIP
			IAGILFPVPFFLMIVIRQYLLPKFFDPVVLRELDAAEYEELDGVPLEHKLEDEASEVGSCPSRPDAEILDELTTNRGELK
			HRSSSLREERPIQVTVSTHMVASSAVQPSL
Zea mays	ZmBOR4	Zm00001d009789_P006	MSRPNKAPFSGVTEDLKGRAGCYKQDWNHGFRSGLRILAPTLYIFFASAVPVIAFGEQLSKDTDSALTTVETLASTAICG
			IIHSIIGGQPLLIVGVAEPTIIMYTYIYNFAKNQPNLGEKMFLPWAAWVCIWTAVMLFLMAIFNVAAILNKFTRFAGELF
			GMLITILFMQEAIKGMVGEFSAPDGSNQSQSTFQFQWLYINGLLGFIFSMGVLYTALASRSARSSLYGTAWQRSLIADYG
			VPLMVILWTALSYSLPSRIPSGVPRRLFTPLPWEPKSLQHWTVAKDLFSVPTVHIFLAIVPATMVAGLYFFDHSVASQMS
			QQKEFNLKNPSAYHYDILVLSLTTLICGLLGIPPSNGVLPQSPMHTRSLAVLKRQLLRKKMVQTAKEGMMNNATSSEVYV
			KMQDVFIKMDHGGDVSTISTKHLHYHMPCSSHYITKALLSVSAHKELKDLKDAIIPEGNGSGTVPEVFDPEKHVDAYLPV
			RVNEQRVSNLLQSLLIAGCIGVTPLIQKIPTSVLWGYFAYMSIDSLPGNQFWERIQLLFITPQRRYKVLEGAHASFMESV
			PFNTICTFTLFQLIYLLIVFGMTWIPVAGILFPLLFFFLIIIRQHFIPKYFDPSHLRELDAAEYEELKGFTPDPSVCEDE
			SVRSGDAQPGYASEILEEFTTHRGELKRRNSTFRDGRLLQLNSIKMTRELSRAPSRLT
