# Supplementary material for: Molecular characterization of the genome-wide BOR transporter family and their responses to boron conditions in common wheat (Triticum aestivum L.)
Source: Front Plant Sci. 2022 Oct 6;13:997915. doi: 10.3389/fpls.2022.997915 (PMC9583536; doi:10.3389/fpls.2022.997915)
Supplement: Supplementary file 2 [file Table_2.xlsx]

## Sheet: primer
Number	Gene	Forword	Reverse
1	BOR1-5A	ATGCTCCAAGTGCCAGTCAT	CACGCTGTGGTCGAAGTAGT
2	BOR1-5B	CGCTCAGCAGGCGGAATTTA	GCCACACATCAGTGTCAGGA
3	BOR1-5D	CTGGACAGTCATCAAGGATATGGC	CACGCTGTGGTCGAAGTAG
4	BOR3-3A	TCCCGCTGCCTTTCTTCATT	GCCATCTTCCTCCGGTGTTT
5	BOR3-3B	TCCCGAAGTTCTTTGAGCCC	CTGAGCCATCTTCCTCCAGT
6	BOR3-3D	GCACTCCCTGTCATCTCCTTC	AGGTTCGGCAACTCCGACAA
7	BOR3-4B	CCGCAGTTCGCCCATATAC	TCCACGCGATCACCATAAGA
8	BOR3-4D	ATGTCAATGGCCTACTTGGTGT	TCAGCAATGAAGCTCCTAACA
9	BOR4-1A	GGTTGCGGGGCTCTATTTCT	CACCGAAAAGCTCAGGACCA
10	BOR4-1B	TTGGAGTTGTGCCGGTCATT	CTTCAAGAACCTTGTAGCGCC
11	BOR4-1D	GGTTGCATTGGAGTTGTGCC	TTCAAGAACCTTGTAGCGCC
12	BOR3-7B	CTGCATACCGGCTTCAGGAT	GTCCGCCGAGTATCGAATGT
