# Supplementary material for: Molecular characterization of the genome-wide BOR transporter family and their responses to boron conditions in common wheat (Triticum aestivum L.)
Source: Front Plant Sci. 2022 Oct 6;13:997915. doi: 10.3389/fpls.2022.997915 (PMC9583536; doi:10.3389/fpls.2022.997915)
Supplement: Supplementary file 3 [file Table_3.XLSX]

## Sheet: protein similarity
Gene	TaBOR4-1A	TaBOR4-1B	TaBOR4-1D	TaBOR3-3A	TaBOR3-3B	TaBOR3-3D	TaBOR3-4B	TaBOR3-4D	TaBOR1-5A	TaBOR3-5A	TaBOR1-5B	TaBOR1-5D	TaBOR3-7B	TaBOR3-7D	OsBOR1	OsBOR2	OsBOR3	OsBOR4
TaBOR4-1A
TaBOR4-1B	98.7
TaBOR4-1D	99.3	98.1
TaBOR3-3A	70.7	70.3	70.4
TaBOR3-3B	70.3	69.8	70	97.4
TaBOR3-3D	70.7	70.3	70.4	97.7	97.9
TaBOR3-4B	68.8	68.7	68.8	88.7	89.2	89.5
TaBOR3-4D	68.5	68.3	68.5	88.4	88.6	89.5	96.8
TaBOR1-5A	52.1	52.1	52.4	54.8	55.2	55.2	53.8	53.9
TaBOR3-5A	67.5	67.5	67.5	88.9	89	89.5	96.4	95.9	53.6
TaBOR1-5B	52.2	52.2	52.5	55	55.2	55.2	53.8	53.9	99	53.6
TaBOR1-5D	52.2	52.2	52.5	55.2	55.3	55.3	53.8	54.1	98.7	53.8	99
TaBOR3-7B	67.6	67.6	67.6	83.3	83.3	83.6	83.6	83.6	53.7	83.6	54	53.9
TaBOR3-7D	68.3	68.3	68.3	83.7	83.7	84	83.7	83.8	54.2	83.8	54.5	54.4	97.5
OsBOR1	52.6	52.6	53.2	56	56.1	56.1	55.1	55.7	91.1	55.2	91.3	91.4	54.3	55.1
OsBOR2	70.2	70	70.2	84.6	85.2	85.4	83.7	84	55.3	83.7	55.6	55.6	82.1	82.7	55.9
OsBOR3	69.8	69.5	69.8	83.4	84.2	83.9	83	82.7	55.8	83.4	56.1	56.1	82	82.3	56.4	94.8
OsBOR4	82	81.8	82	74	74	74.5	72.2	71.6	54.1	71.9	54.3	54.3	70.7	71.5	55.5	73.3	73.2
