# Supplementary material for: Molecular characterization of the genome-wide BOR transporter family and their responses to boron conditions in common wheat (Triticum aestivum L.)
Source: Front Plant Sci. 2022 Oct 6;13:997915. doi: 10.3389/fpls.2022.997915 (PMC9583536; doi:10.3389/fpls.2022.997915)
Supplement: Supplementary file 4 [file Table_4.XLSX]

## Sheet: annotation
species	ID	pfam	accession	E-value	annotation
Triticum aestivum	Traes_3B_74F7233A8.1	GH3	PF03321	5.01e-197	early auxin-responsive gene
Triticum aestivum	Traes_2DL_E22045951.1	BRX	PF08381	9.1e-30	act as a regulator of cell proliferation and elongation in the root
Triticum aestivum	Traes_2DL_3364EB114.1	BRX	PF08381	1.7e-30	act as a regulator of cell proliferation and elongation in the root
Triticum aestivum	Traes_3AL_ECD0E2644.1	GH3	PF03321	6.3e-31	early auxin-responsive gene
Triticum aestivum	Traes_2BL_8A069752E.2	BRX	PF08381	2.23e-29	act as a regulator of cell proliferation and elongation in the root
Triticum aestivum	Traes_2AL_61767336D.1	BRX	PF08381	2.4e-29	act as a regulator of cell proliferation and elongation in the root
Triticum aestivum	Traes_3AL_CF10A04DA.1	bHLH-MYC_N	PF14215	5.9e-20	MYB and MYC transcription factors
Triticum aestivum	Traes_3B_C1040DD61.1	bHLH-MYC_N	PF14215	3.6e-30	MYB and MYC transcription factors
Triticum aestivum	Traes_4DL_326FB9571.1	NB-ARC	PF00931	4.4e-21	apoptotic protease-activating factor 1 (Apaf-1)
Triticum aestivum	Traes_1DS_CC44C30ED.1	AdoHcyase	PF05221	5.6e-10	Adenosylhomocysteinase
